# Supplementary material
Source: PubMed Central journal article supplement (PMC5775894)
Supplement: ijsem-67-2121-s001.pdf [file ijsem-67-2121-s001.pdf]

## Supplemental Material

Supplemental Table 1. PCR assays used in this study

| Primer Pair                                                        | Target Gene/Encoded Protein             | Forward                                                      | Reverse                                                                      | Anneal Temp (°C) | Amp Size (bp) | Source                                                        |
|--------------------------------------------------------------------|-----------------------------------------|--------------------------------------------------------------|------------------------------------------------------------------------------|------------------|---------------|---------------------------------------------------------------|
| nadaF2 / pxcr6 (1°)<br>nadAF.108 / nadAR.569 (2°)                  | <i>nadA</i> /quinolinate synthetase     | ACG TCA TTT GGC TCA GGA<br>GAA AAG CAG CCA CAA CAA CAG       | CAA ACG CAT ATG TGG GCA<br>CTT AAT AAA TGA CCA GGA CAC TC                    | 48<br>57         | 754<br>440    | Yu <i>et al.</i> , 1997<br>This study                         |
| fbpAF / fbpAR (1°)<br>fbpAF.240 / fbpAR.743 (2°)                   | <i>fbpA</i> /iron binding protein       | ATG ATG AGA TTR MTT GCT TG<br>CAG CCT GTG CAA TCT GAA GC     | CTA TCT CCA MCC ACA CTC AT<br>CTT TGT AAC AGC ACC ACC GC                     | 48<br>55         | 1005<br>465   | Doyle <i>et al.</i> , 2005b<br>This study                     |
| MUR-Groel-F / MUR-Groel-R (1°)<br>MUR-Groel-INF / MUR-Groel-R (2°) | <i>groEL</i> /heat shock protein operon | GGA TCC ATT GGC TCT TGC TA<br>AAG GGA TTC AAA GAA TTG GAT G  | CCA CCA ACC TTT AAG ACA GCA                                                  | 52<br>52         | 927<br>573    | Telford <i>et al.</i> , 2011                                  |
| EmCS638F / EmCS1349R (1°)<br>EmCS innerF / EmCS innerR (2°)        | <i>gltA</i> /citrate synthase           | TAC AGA TTT CTC AAG AAT ATA CA<br>TGG CAT GTT TTT CTG CCT TA | AAT GCA ATG TTT TCT AAT TCT AC<br>TGA CCA AAA CCC ATT AAT CTT G              | 57<br>52         | 666<br>455    | Tamamota <i>et al.</i> , 2007<br>Telford <i>et al.</i> , 2011 |
| DSB-330 / DSB-728 (1°)<br>DSB-330 / DSB-671 (2°)                   | <i>dsb</i> /disulfide oxidoreductase    | GAT GAT GTC TGA AGA TAT GAA ACA AAT                          | CTG CTC GTC TAT TTT ACT TCT TAA AGT<br>GCT GCT CCA CCA ATA AAT GTA TCY CCT A | 60<br>61         | 355<br>317    | Doyle <i>et al.</i> , 2005a                                   |
| P28-14-F / P28-14-R1 (1°)<br>P28-14-F / P28-14-R2 (2°)             | <i>p28-14</i> /outer membrane protein   | GCA GAT CCT GTA ACT TCC AA                                   | CAC CAA AGT ATC CAG TGT CA<br>TGA AGC GGA TGT AGT TTG AG                     | 58<br>62         | 782<br>754    | This study                                                    |
| P28-19-F1 / P28-19-R1 (1°)<br>P28-19-F2 / P28-19-R2 (2°)           | <i>p28-19</i> /outer membrane protein   | TGG TAA CTT CTA TAT CAG CGG<br>GGA TGG AGC TGC AAT ATC TA    | GCA AGA GTT GAT CCA CTA GG<br>GAA AGT GTC CAC CAA CAA AC                     | 61<br>64         | 624<br>436    | This study                                                    |
| p13-F / p13-R1 (1°)<br>p13-F / p13-R2 (2°)                         | <i>p13</i> /outer membrane protein      | CTG AAA GGA ATC TGC AAG GA                                   | TAT CCT GCA TTT TAG GAC GC<br>CAA TGA TGA TAC TGC GAA CAA                    | 60<br>62         | 235<br>148    | This study                                                    |
